# Supplementary material for: Passive smoking in childhood and adulthood and risk of rheumatoid arthritis in women: results from the French E3N cohort study
Source: HighWire-hosted journal article supplement (doi:10.1136/rmdopen-2021-001980), 2022-02-01
Supplement: rmdopen-2021-001980supp001_data_supplement.pdf [file rmdopen-2021-001980supp001_data_supplement.pdf]

## SUPPLEMENTARY MATERIAL

**Supplementary Table 1.** Hazard ratios (95% confidence intervals) for incident seropositive rheumatoid arthritis (RA) according to passive smoking in adulthood, overall and after stratified by ever-smoking status among women in the E3N cohort (N = 79,806).

|                                               | Cases, no./person-<br>years, no. | Model 1<br>HR (95% CI) | Model 2<br>HR (95% CI) |
|-----------------------------------------------|----------------------------------|------------------------|------------------------|
| <b>All population (N=79,318)</b>              |                                  |                        |                        |
| Passive smoking in adulthood                  |                                  |                        |                        |
| No                                            | 99/875,345                       | Reference              | Reference              |
| Yes                                           | 111/1,015,242                    | 0.97 [0.74; 1.27]      | 0.91 [0.69; 1.20]      |
| <i>P-value</i>                                |                                  | 0.005                  | 0.025                  |
| <b>Never smokers (N=42,927)</b>               |                                  |                        |                        |
| Passive smoking in adulthood                  |                                  |                        |                        |
| No                                            | 57/551,540                       | Reference              | Reference              |
| Yes                                           | 50/470,651                       | 1.03 [0.70; 1.50]      | 1.04 [0.71; 1.53]      |
| <i>P-value</i>                                |                                  | 0.032                  | 0.029                  |
| <b>Ever smokers (N=36,391)</b>                |                                  |                        |                        |
| Passive smoking in adulthood                  |                                  |                        |                        |
| No                                            | 42/323,804                       | Reference              | Reference              |
| Yes                                           | 61/544,591                       | 0.87 [0.58; 1.28]      | 0.86 [0.58; 1.27]      |
| <i>P-value</i>                                |                                  | 0.22                   | 0.20                   |
| <b>All population (N=79,318)</b>              |                                  |                        |                        |
| Never smoker, no passive smoking in adulthood | 57/551,540                       | Reference              | Reference              |
| Never smoker, passive smoking in adulthood    | 50/470,651                       | 1.03 [0.70; 1.51]      | 1.01 [0.69; 1.48]      |
| Ever smoker, no passive smoking in adulthood  | 42/323,804                       | 1.09 [0.76; 1.57]      | 1.04 [0.72; 1.51]      |
| Ever smoker, passive smoking in adulthood     | 61/544,591                       | 1.26 [0.85; 1.88]      | 1.23 [0.82; 1.83]      |

M1: Adjusted for age (as the timescale)

M2: Adjusted for age (as the timescale), active smoking status (current smoker, non-smoker, former smoker, except for stratified and combined analyses), passive smoking in childhood, body mass index (kg/m<sup>2</sup>) (< 18.5 kg/m<sup>2</sup>, [18.5-25[ kg/m<sup>2</sup>, [25-30[ kg/m<sup>2</sup>, ≥ 30 kg/m<sup>2</sup>), and educational level (< High School, up to 2-level university, 3-4 level university)

Abbreviations: HR: hazard ratios; 95% CI; 95% confidence interval.
